# Supplementary material for: Serotonin 5-HT 1A receptor binding and self-transcendence in healthy control subjects—a replication study using Bayesian hypothesis testing
Source: PeerJ journal article supplement (doi:10.7717/peerj.5790), 2018-11-16
Supplement: Supplementary_information.pdf [file Supplementary_information.pdf]

## Supplementary information

*Results after twin exclusion and using cerebellar white matter as reference region*

**Table 3** *Pearson's r and default BF for 5-HT<sub>1A</sub> receptor binding and self-transcendence (ST) and spiritual acceptance (SA) assessed by TCI for frontal cortex, hippocampus and dorsal raphe nuclei for present replication and Karlsson's replication.*

|                                                     |       | Pearson's r    |              | BF <sub>0-</sub> |              |     |
|-----------------------------------------------------|-------|----------------|--------------|------------------|--------------|-----|
|                                                     |       | Twin exclusion | White matter | Twin exclusion   | White matter |     |
| <b>Self-transcendence</b>                           |       |                |              |                  |              |     |
| - frontal cortex                                    | -0.06 | 0.16           | -0.07        | 5.3              | 8.3          | 3.7 |
| - hippocampus                                       | -0.19 | -0.02          | -0.23        | 2.5              | 4.3          | 5.9 |
| - dorsal raphe nuclei                               | -0.11 | -0.10          |              | 4.3              | 2.9          |     |
| <b>Spiritual acceptance vs material rationalism</b> |       |                |              |                  |              |     |
| - frontal cortex                                    | -0.03 | 0.19           | -0.01        | 5.6              | 9.1          | 5.3 |
| - hippocampus                                       | -0.12 | 0.07           | -0.13        | 4.2              | 6.3          | 2.4 |
| - dorsal raphe nuclei                               | -0.16 | -0.09          |              | 3.1              | 2.9          |     |

*Abbreviations:* TCI, Temperament and Character Inventory; r, Pearson's correlation efficient; BF<sub>0-</sub>, the default BF representing the likelihood for the null hypothesis (H<sub>0</sub>: no correlation) versus the alternative hypothesis (H<sub>1</sub>: negative correlation).

### *Calculation of PPV*

PPV is the positive predictive value (i.e. the chance of the finding being true) and has the following formula:

$$PPV = \frac{(1-\beta) \times R}{(1-\beta) \times R + \alpha}$$

where  $1 - \beta$  is the power and  $\beta$  the type II error; R is the pre-study odds (in our case the probability of any one personality scale being correlated with 5-HT<sub>1A</sub> receptor binding);  $\alpha$  is the type I error (the statistical significance level).

We made the following assumptions:

- We calculate for an effect size of Pearson's  $R = 0.5$ . This represents a large effect (Cohen, 1988). We calculated the power using this effect size using the "pwr" package in R (Stephane Champely (2015).
- We assume a pre-study odds of 10%. We believe that this is a liberal estimate for comparisons of receptor binding and personality traits.
- The sample size of the original study was 15.
- We set  $\alpha = 0.05$  for 10 analyses without correction for multiple comparisons. The original analysis was performed first with three ROIs for seven dimensions, after which self-transcendence was found to be significantly associated with ST ( $p < 0.05$ ). Due to the high correlations between regional binding estimates, it is an exaggeration to consider this as 21 independent comparisons. Instead, we approximate it as 10 comparisons, comprised of 7 approximately independent original personality dimensions, and three more to account for the multiple ROIs. This means that we assume a final type I error rate of 0.5 (50%).
